# Supplementary material for: Examining the Use of Police and Ambulance Data in Suicide Research
Source: Atypon-hosted journal article supplement (doi:10.1027/0227-5910/a000739), 2020-11-26
Supplement: 0227-5910_a000739_esm1.pdf [file 0227-5910_a000739_esm1.pdf]

**PUBMED Search Terms.**

The PUBMED search was (((("Medical Record Linkage"[Mesh] OR ("Records as Topic/statistics and numerical data"[Mesh])) OR record\*[tiab] link\*[tiab]) OR data\*[tiab] link\*[tiab])) AND (((((((("Self-Injurious Behavior"[Mesh:NoExp]) OR "Self Mutilation"[Mesh] OR "Suicide"[Mesh:NoExp] OR "Suicidal Ideation"[Mesh] OR "Suicide, Attempted"[Mesh])) OR (((Suicid\*[tiab] thought\*[tiab]) OR Suicid\*[tiab] think\*[tiab]) OR Suicid\*[tiab] cris\*[tiab]) OR Suicid\*[TIAB] Idea\*[tiab]) OR Suicidalit\*[tiab])))). Terms and logic were tailored for the Scopus search.

**Supplementary Table 1: Studies based on linked police or ambulance data, excluded with reasons**

| Reference                                                                                                                                                                                                                                                                                                         | Reason for exclusion*                                           |
|-------------------------------------------------------------------------------------------------------------------------------------------------------------------------------------------------------------------------------------------------------------------------------------------------------------------|-----------------------------------------------------------------|
| 1 Amundsen, E. J. (2017). Lack of overlap and large discrepancies in the characteristics of the deceased in two sources of drug death. A linkage study of the Cause of Death and the Police Registries in Norway 2007–2009. <i>International Journal of Drug Policy</i> , 41, 74-79.                              | Exclusion criterion 2                                           |
| 2 Annor, F. B., Bayakly, R. A., Morrison, R. A., Bryan, M. J., Gilbert, L. K., Ivey-Stephenson, A. Z., . . . Simon, T. R. (2019). Suicide Among Persons With Dementia, Georgia, 2013 to 2016. <i>Journal of Geriatric Psychiatry and Neurology</i> , 32(1), 31-39.                                                | Exclusion criterion 6                                           |
| 3 Arnberg, F. K., Gudmundsdóttir, R., Butwicka, A., Fang, F., Lichtenstein, P., Hultman, C. M., & Valdimarsdóttir, U. A. (2015). Psychiatric disorders and suicide attempts in Swedish survivors of the 2004 southeast Asia tsunami: A 5 year matched cohort study. <i>The Lancet Psychiatry</i> , 2(9), 817-824. | Police records used as sampling frame to identify alive cohort. |
| 4 Austin, A. E., Vladutiu, C. J., Jones-Vessey, K. A., Norwood, T. S., Proescholdbell, S. K., & Menard, M. K. (2016). Improved Ascertainment of Pregnancy-Associated Suicides and Homicides in North Carolina. <i>American Journal of Preventive Medicine</i> , 51(5), S234-s240.                                 | Exclusion criterion 7                                           |
| 5 Bahraini, N. H., Gutierrez, P. M., Harwood, J. E., Huggins, J. A., Hedegaard, H., Chase, M., & Brenner, L. A. The Colorado Violent Death Reporting System (COVDRS): validity and utility of the Veteran status variable. <i>Public Health Reports</i> , 127(3), 304-309.                                        | Exclusion criterion 7                                           |
| 6 Barber, C. W., Azrael, D., Hemenway, D., Olson, L. M., Nie, C., Schaechter, J., & Walsh, S. (2008). Suicides and suicide attempts following homicide: Victim-suspect relationship, weapon type, and presence of antidepressants. <i>Homicide Studies</i> , 12(3), 285-297.                                      | Exclusion criterion 6                                           |

|    |                                                                                                                                                                                                                                                                                                        |                                    |
|----|--------------------------------------------------------------------------------------------------------------------------------------------------------------------------------------------------------------------------------------------------------------------------------------------------------|------------------------------------|
| 7  | Barbieri, S., Omizzolo, L., Tredese, A., Vettore, G., Calaon, A., Behr, A. U., . . . Feltracco, P. (2018). The rise of new alcoholic games among adolescents and the consequences in the emergency department: Observational retrospective study. <i>Journal of Medical Internet Research, 20</i> (4). | Violation of inclusion criterion 3 |
| 8  | Barner-Rasmussen, P., Dupont, A., & Bille, H. (1986). Suicide in psychiatric patients in Denmark, 1971-81. I. Demographic and diagnostic description. <i>Acta Psychiatrica Scandinavica, 73</i> (4), 441-448.                                                                                          | Exclusion criterion 6              |
| 9  | Basham, C., Denneson, L. M., Millet, L., Shen, X., Duckart, J., & Dobscha, S. K. Characteristics and VA health care utilization of U.S. Veterans who completed suicide in Oregon between 2000 and 2005. <i>Suicide and Life-Threatening Behavior, 41</i> (3), 287-296.                                 | Exclusion criterion 6              |
| 10 | Borschmann, R., Young, J. T., Moran, P., Spittal, M. J., Snow, K., Mok, K., & Kinner, S. A. (2017). Accuracy and predictive value of incarcerated adults' accounts of their self-harm histories: findings from an Australian prospective data linkage study. <i>CMAJ Open, 5</i> (3), E694-E701.       | Exclusion criterion 7              |
| 11 | Calam, R., Horne, Louise, Glasgow, David, Cox, Antony. (1998). Psychological disturbance and child sexual abuse: a follow-up study <i>Child Abuse &amp; Neglect, 22</i> (9), 901-913.                                                                                                                  | Violation of inclusion criterion 1 |
| 12 | Cerel, J., Singleton, M. D., Brown, M. M., Brown, S. V., Bush, H. M., & Brancado, C. J. (2016). Emergency department visits prior to suicide and homicide: Linking statewide surveillance systems. <i>Crisis, 37</i> (1), 5-12.                                                                        | Exclusion criterion 6              |
| 13 | Chang, S. S., Bjørngaard, J. H., Tsai, M. K., Bjerkeset, O., Wen, C. P., Yip, P. S. F., . . . Gunnell, D. (2016). Heart rate and suicide: Findings from two cohorts of 533 000 Taiwanese and 75 000 Norwegian adults. <i>Acta Psychiatrica Scandinavica, 133</i> (4), 277-288.                         | Exclusion criterion 6              |
| 14 | Cho, J., Lee, W. J., Moon, K. T., Suh, M., Sohn, J., Ha, K. H., . . . Jung, S. H. Medical care utilization during 1 year prior to death in suicides motivated by physical illnesses. <i>Journal of Preventive Medicine and Public Health, 46</i> (3), 147-154.                                         | Exclusion criterion 6              |
| 15 | Choi, N. G., DiNitto, D. M., Marti, C. N., & Kaplan, M. S. (2017). Older Suicide Decedents: Intent Disclosure, Mental and Physical Health, and Suicide Means. <i>American Journal of Preventive Medicine, 53</i> (6), 772-780.                                                                         | Exclusion criterion 6              |
| 16 | Deisenhammer, E. A., Behrndt, E. M., Kemmler, G., Haring, C., & Miller, C. A comparison of suicides in psychiatric in-patients, after discharge and in not recently hospitalized individuals. <i>Comprehensive Psychiatry, 69</i> , 100-105.                                                           | Exclusion criterion 6              |
| 17 | Denneson, L. M., Basham, C., Dickinson, K. C., Crutchfield, M. C., Millet, L., Shen, X., & Dobscha, S. K. Suicide risk assessment and content of VA health care contacts before suicide completion by veterans in Oregon. <i>Psychiatric Services, 61</i> (12), 1192-1197.                             | Exclusion criterion 6              |

|    |                                                                                                                                                                                                                                                                                                                        |                                    |
|----|------------------------------------------------------------------------------------------------------------------------------------------------------------------------------------------------------------------------------------------------------------------------------------------------------------------------|------------------------------------|
| 18 | Duncan, D. T., & Hatzenbuehler, M. L. Lesbian, gay, bisexual, and transgender hate crimes and suicidality among a population-based sample of sexual-minority adolescents in Boston. <i>American Journal of Public Health, 104</i> (2), 272-278.                                                                        | Violation of inclusion criterion 1 |
| 19 | Edwards, N., , A., an, R., MacDonald, D., Sikdar, K., Collins, K., & Avis, S. Suicide in Newfoundland and Labrador: a linkage study using medical examiner and vital statistics data. <i>Canadian Journal of Psychiatry, 53</i> (4), 252-259.                                                                          | Exclusion criterion 7              |
| 20 | Ferreira, T. D. G., Vedana, K. G. G., do Amaral, L. C., Pereira, C. C. M., Zanetti, A. C. G., Miasso, A. I., & Borges, T. L. (2019). Assistance related to suicidal behavior at a mobile emergency service: Sociodemographic and clinical associated factors. <i>Archives of Psychiatric Nursing, 33</i> (2), 136-142. | Violation of inclusion criterion 1 |
| 21 | Fowler, K. A., Jack, S. P. D., Lyons, B. H., Betz, C. J., & Petrosky, E. (2018). Surveillance for violent deaths - National violent death reporting system, 18 states, 2014. <i>MMWR Surveillance Summaries, 67</i> (2), 1-36.                                                                                         | Exclusion criterion 6              |
| 22 | Galway, K., Gosrau-Breen, D., Mallon, S., Hughes, L., Rosato, M., Rondon-Sulbaran, J., & Leavey, G. Substance misuse in life and death in a 2-year cohort of suicides. <i>British Journal of Psychiatry, 208</i> (3), 292-297.                                                                                         | Exclusion criterion 6              |
| 23 | Gatov, E., Kurdyak, P., Sinyor, M., Holder, L., & Schaffer, A. (2017). Comparison of Vital Statistics Definitions of Suicide against a Coroner Reference Standard: A Population-Based Linkage Study. <i>Canadian Journal of Psychiatry, 70</i> 6743717737033.                                                          | Exclusion criterion 7              |
| 24 | Gold, K. J., Singh, V., Marcus, S. M., & Palladino, C. L. (2012). Mental health, substance use and intimate partner problems among pregnant and postpartum suicide victims in the National Violent Death Reporting System. <i>General Hospital Psychiatry, 34</i> (2), 139-145.                                        | Exclusion criterion 6              |
| 25 | Hedlund, J., Ahlner, J., Kristiansson, M., & Sturup, J. (2014). A population-based study on toxicological findings in Swedish homicide victims and offenders from 2007 to 2009. <i>Forensic Science International, 244</i> , 25-29.                                                                                    | Exclusion criterion 6              |
| 26 | Hernandez-Meier, J. L., Akert, B., Zheng, C., Guse, C. E., Layde, P. M., & Hargarten, S. (2019). Status of legal firearm possession and violent deaths: Methods and protocol for a retrospective case-control study. <i>Injury Prevention.</i>                                                                         | Violation of inclusion criterion 1 |
| 27 | Jamison, E. C., Bol, K. A., & Mintz, S. N. (2019). Analysis of the Effects on Time between Divorce Decree and Suicide. <i>Crisis, 40</i> (5), 309-316.                                                                                                                                                                 | Exclusion criterion 6              |
| 28 | Jayasinghe, N. R., & Foster, J. H. (2011). Deliberate self-harm/poisoning, suicide trends. The link to increased alcohol consumption in Sri Lanka. <i>Archives of Suicide Research, 15</i> (3), 223-237.                                                                                                               | Violation of inclusion criterion 1 |

|    |                                                                                                                                                                                                                                                                                                                      |                                    |
|----|----------------------------------------------------------------------------------------------------------------------------------------------------------------------------------------------------------------------------------------------------------------------------------------------------------------------|------------------------------------|
| 29 | Johansson, L., Lindqvist, P., & Eriksson, A. Teenage suicide cluster formation and contagion: implications for primary care. <i>BMC Family Practice</i> , 7, 32.                                                                                                                                                     | Exclusion criterion 6              |
| 30 | Kellermann, A. L., Rivara, F. P., Lee, R. K., Banton, J. G., Cummings, P., Hackman, B. B., & Somes, G. Injuries due to firearms in three cities. <i>New England Journal of Medicine</i> , 335(19), 1438-1444.                                                                                                        | Violation of inclusion criterion 3 |
| 31 | Kristiansen, T., Lossius, H. M., Rehn, M., Kristensen, P., Gravseth, H. M., Røislien, J., & Søreide, K. (2014). Epidemiology of trauma: A population-based study of geographical risk factors for injury deaths in the working-age population of Norway. <i>Injury</i> , 45(1), 23-30.                               | Violation of inclusion criterion 3 |
| 32 | Lahti, A., Harju, A., Hakko, H., Riala, K., & Räsänen, P. (2014). Suicide in children and young adolescents: A 25-year database on suicides from Northern Finland. <i>Journal of Psychiatric Research</i> , 58, 123-128.                                                                                             | Exclusion criterion 6              |
| 33 | Logan, J., Hill, H. A., Black, M. L., Crosby, A. E., Karch, D. L., Barnes, J. D., & Lubell, K. M. (2008). Characteristics of perpetrators in homicide-followed-by-suicide incidents: National Violent Death Reporting System - 17 US States, 2003-2005. <i>American Journal of Epidemiology</i> , 168(9), 1056-1064. | Exclusion criterion 6              |
| 34 | Logan, J. E., Skopp, N. A., Reger, M. A., Gladden, M., Smolenski, D. J., Floyd, C. F., & Gahm, G. A. Precipitating circumstances of suicide among active duty U.S. Army personnel versus U.S. civilians, 2005-2010. <i>Suicide and Life Threatening Behavior</i> , 45(1), 65-77.                                     | Exclusion criterion 6              |
| 35 | Manley, N. R., Croce, M. A., Fischer, P. E., Crowe, D. E., Goines, J. H., Sharpe, J. P., . . . Magnotti, L. J. (2019). Evolution of Firearm Violence over 20 Years: Integrating Law Enforcement and Clinical Data. <i>Journal of the American College of Surgeons</i> , 228(4), 427-434.                             | Violation of inclusion criterion 3 |
| 36 | Martiniuk, A. L., Ivers, R. Q., Glozier, N., Patton, G. C., Lam, L. T., Boufous, S., . . . Norton, R. Self-harm and risk of motor vehicle crashes among young drivers: findings from the DRIVE Study. <i>CMAJ</i> , 181(11), 807-812.                                                                                | Exclusion criterion 6              |
| 37 | Mellesdal, L., Kroken, R. A., Lutro, O., Wentzel-Larsen, T., Kjelby, E., Oedegaard, K. J., . . . Mehlum, L. (2014). Self-harm induced somatic admission after discharge from psychiatric hospital - A prospective cohort study. <i>European Psychiatry</i> , 29(4), 246-252.                                         | Exclusion criterion 6              |
| 38 | Mellesdal, L., Gjestad, R., Johnsen, E., Jørgensen, H. A., Oedegaard, K. J., Kroken, R. A., & Mehlum, L. (2015). Borderline Personality Disorder and Posttraumatic Stress Disorder at Psychiatric Discharge Predict General Hospital Admission for Self-Harm. <i>Journal of Traumatic Stress</i> , 28(6), 556-562.   | Exclusion criterion 6              |

|    |                                                                                                                                                                                                                                                                                                          |                                    |
|----|----------------------------------------------------------------------------------------------------------------------------------------------------------------------------------------------------------------------------------------------------------------------------------------------------------|------------------------------------|
| 39 | Meyer-Rochow, V. B., Hakko, H., Ojamo, M., Uusitalo, H., & Timonen, M. (2015). Suicides in Visually Impaired Persons: A Nation-Wide Register-Linked Study from Finland Based on Thirty Years of Data. <i>PLoS ONE</i> , <i>10</i> (10), e0141583.                                                        | Exclusion criterion 6              |
| 40 | Moskowitz, A., Simpson, A. I. F., McKenna, B., Skipworth, J., & Barry-Walsh, J. (2006). The role of mental illness in homicide-suicide in New Zealand, 1991-2000. <i>Journal of Forensic Psychiatry &amp; Psychology</i> , <i>17</i> (3), 417-430.                                                       | Exclusion criterion 6              |
| 41 | Oliver, J. E. (1985). Successive generations of child maltreatment: social and medical disorders in the parents. <i>British Journal of Psychiatry</i> , <i>147</i> , 484-490.                                                                                                                            | Violation of inclusion criterion 3 |
| 42 | Parks, S. E., Johnson, L. L., McDaniel, D. D., & Gladden, M. (2014). Surveillance for violent deaths - National Violent Death Reporting System, 16 states, 2010. <i>MMWR Surveillance Summaries</i> , <i>63</i> (1), 1-33.                                                                               | Exclusion criterion 6              |
| 43 | Partonen, T., Haukka, J., Pirkola, S., Isometsa, E., & Lonnqvist, J. Time patterns and seasonal mismatch in suicide. <i>Acta Psychiatrica Scandinavica</i> , <i>109</i> (2), 110-115.                                                                                                                    | Exclusion criterion 6              |
| 44 | Petrosky, E., Harpaz, R., Fowler, K. A., Bohm, M. K., Helmick, C. G., Yuan, K., & Betz, C. J. (2018). Chronic Pain Among Suicide Decedents, 2003 to 2014: Findings From the National Violent Death Reporting System. <i>Annals of Internal Medicine</i> , <i>169</i> (7), 448-455.                       | Exclusion criterion 6              |
| 45 | Pushpakumara, P. H. G. J., Thennakoon, S. U. B., Rajapakse, T. N., Abeysinghe, R., & Dawson, A. H. (2019). A prospective study of repetition of self-harm following deliberate self-poisoning in rural Sri Lanka. <i>PLoS One</i> , <i>14</i> (2).                                                       | Exclusion criterion 6              |
| 46 | Schaffer, A., Sinyor, M., Kurdyak, P., Vigod, S., Sareen, J., Reis, C., . . . Cheung, A. (2016). Population-based analysis of health care contacts among suicide decedents: Identifying opportunities for more targeted suicide prevention strategies. <i>World Psychiatry</i> , <i>15</i> (2), 135-145. | Exclusion criterion 6              |
| 47 | Schwab-Reese, L. M., & Peek-Asa, C. (2019). Factors contributing to homicide-suicide: differences between firearm and non-firearm deaths. <i>Journal of Behavioral Medicine</i> , <i>42</i> (4), 681-690.                                                                                                | Exclusion criterion 6              |
| 48 | Shiffler, T., Hargarten, S. W., & Withers, R. L. The burden of suicide and homicide of Wisconsin's children and youth. <i>WMJ</i> , <i>104</i> (1), 62-67.                                                                                                                                               | Exclusion criterion 6              |
| 49 | Sohn, J., Cho, J., Moon, K. T., Suh, M., Ha, K. H., Kim, C., . . . Jung, S. H. Medical care expenditure in suicides from non-illness-related causes. <i>Journal of Preventive Medicine and Public Health</i> , <i>47</i> (6), 327-335.                                                                   | Exclusion criterion 6              |
| 50 | Soole, R., Kólves, K., & De Leo, D. (2014). Suicides in Aboriginal and Torres Strait Islander children: analysis of Queensland Suicide Register. <i>Australian and New Zealand Journal of Public Health</i> , <i>38</i> (6), 574-578.                                                                    | Exclusion criterion 6              |

---

|    |                                                                                                                                                                                                                                                                                                                        |                       |
|----|------------------------------------------------------------------------------------------------------------------------------------------------------------------------------------------------------------------------------------------------------------------------------------------------------------------------|-----------------------|
| 51 | Sumarokov, Y. A., Brenn, T., Kudryavtsev, A. V., & Nilssen, O. (2014). Suicides in the indigenous and non-indigenous populations in the Nenets Autonomous Okrug, Northwestern Russia, and associated socio-demographic characteristics. <i>International Journal of Circumpolar Health</i> , 73, 24308.                | Exclusion criterion 6 |
| 52 | Walsh, S., Clayton, R., Liu, L., & Hodges, S. Divergence in contributing factors for suicide among men and women in Kentucky: recommendations to raise public awareness. <i>Public Health Reports</i> , 124(6), 861-867.                                                                                               | Exclusion criterion 6 |
| 53 | Weiser, M., Kapra, O., Werbeloff, N., Goldberg, S., Fenchel, D., Reichenberg, A., . . . Davidson, M. A population-based longitudinal study of suicide risk in male schizophrenia patients: Proximity to hospital discharge and the moderating effect of premorbid IQ. <i>Schizophrenia Research</i> , 169(1), 159-164. | Exclusion criterion 6 |
| 54 | Weiser, M., Goldberg, S., Werbeloff, N., Fenchel, D., Reichenberg, A., Shelef, L., . . . Fruchter, E. Risk of completed suicide in 89,049 young males assessed by a mental health professional. <i>European Neuropsychopharmacology</i> , 26(2), 341-349.                                                              | Exclusion criterion 6 |
| 55 | Yang, C. Y. Association between parity and risk of suicide among parous women. <i>CMAJ</i> , 182(6), 569-572.                                                                                                                                                                                                          | Exclusion criterion 6 |

---

---

\* Inclusion criteria:

1) Article reports findings of individual records linkage across at least two datasets.

3) Article examines suicide behaviours, including suicidal thoughts, intentions, behaviours, suicide attempts, self-harm, and suicide deaths, as (i) an aim; or (ii) outcome.

Exclusion criteria:

2) Study reports on suicide, only in relation to the study of cause of death, or death rates in general.

6) Linkage to police or ambulance records is primarily for the purpose of establishing cause, intent, mechanism or manner of death or self-harm (e.g., as part of a coronial investigation).

7) Study has a methodological focus (e.g., investigates case ascertainment).
