# Supplementary material for: Examining the Use of Police and Ambulance Data in Suicide Research
Source: Atypon-hosted journal article supplement (doi:10.1027/0227-5910/a000739), 2020-11-26
Supplement: 0227-5910_a000739_esm2.pdf [file 0227-5910_a000739_esm2.pdf]

**Outcomes of quality appraisal, using Newcastle – Ottawa Scale for assessing the quality of nonrandomised studies in meta-analysis**

([http://www.ohri.ca/programs/clinical\\_epidemiology/oxford.asp](http://www.ohri.ca/programs/clinical_epidemiology/oxford.asp))

Studies could receive between zero and four stars. Bolding indicates which criteria was met.

|                                 |                                                                                                                                                                                                                                                                                                                                                                                                                                                                                                                                                                                                                                                                                                                                                                                                                                                                                                                                                           |
|---------------------------------|-----------------------------------------------------------------------------------------------------------------------------------------------------------------------------------------------------------------------------------------------------------------------------------------------------------------------------------------------------------------------------------------------------------------------------------------------------------------------------------------------------------------------------------------------------------------------------------------------------------------------------------------------------------------------------------------------------------------------------------------------------------------------------------------------------------------------------------------------------------------------------------------------------------------------------------------------------------|
| <b>Borschmann et al. (2017)</b> | Cohort<br>***                                                                                                                                                                                                                                                                                                                                                                                                                                                                                                                                                                                                                                                                                                                                                                                                                                                                                                                                             |
| Selection                       | <p>1) <u>Representativeness of the exposed cohort</u><br/> <b>a) truly representative of the average prison population in Qld in the community *</b><br/> b) somewhat representative of the average _____ in the community *</p> <p>c) selected group of users eg nurses, volunteers<br/> d) no description of the derivation of the cohort</p> <p>2) <u>Selection of the non exposed cohort</u><br/> a) drawn from the same community as the exposed cohort *<br/> b) drawn from a different source<br/> <b>c) no description of the derivation of the non exposed cohort</b></p> <p>3) <u>Ascertainment of exposure</u><br/> <b>a) secure record (eg surgical records) *</b><br/> <b>b) structured interview *</b><br/> c) written self report<br/> d) no description</p> <p>4) <u>Demonstration that outcome of interest was not present at start of study</u><br/> <b>a) yes *</b><br/> b) no</p>                                                     |
| <b>Duncan et al. (2019)</b>     | Cohort<br>**                                                                                                                                                                                                                                                                                                                                                                                                                                                                                                                                                                                                                                                                                                                                                                                                                                                                                                                                              |
| Selection                       | <p>1) <u>Representativeness of the exposed cohort</u><br/> <b>a) truly representative of the average population of individuals who are attended by ambulance due to mental health crisis in the community *</b><br/> b) somewhat representative of the average _____ in the community *</p> <p>c) selected group of users eg nurses, volunteers<br/> d) no description of the derivation of the cohort</p> <p>2) <u>Selection of the non exposed cohort</u><br/> a) drawn from the same community as the exposed cohort *<br/> b) drawn from a different source<br/> <b>c) no description of the derivation of the non exposed cohort</b></p> <p>3) <u>Ascertainment of exposure</u><br/> <b>a) secure record (eg surgical records) *</b><br/> b) structured interview *<br/> c) written self report<br/> d) no description</p> <p>4) <u>Demonstration that outcome of interest was not present at start of study</u><br/> a) yes *<br/> <b>b) no</b></p> |

|                                |                                                                                                                                                                                                                                                                                                                                                                                                                                                                                                                                                                                                                                                  |
|--------------------------------|--------------------------------------------------------------------------------------------------------------------------------------------------------------------------------------------------------------------------------------------------------------------------------------------------------------------------------------------------------------------------------------------------------------------------------------------------------------------------------------------------------------------------------------------------------------------------------------------------------------------------------------------------|
| <b>Fjeldsted et al. (2017)</b> | Case-control<br>****                                                                                                                                                                                                                                                                                                                                                                                                                                                                                                                                                                                                                             |
| Selection                      | <p><b>Selection</b></p> <p>1) <u>Is the case definition adequate?</u><br/> <b>a) yes, with independent validation *</b><br/> b) yes, eg record linkage or based on self reports<br/> c) no description</p> <p>2) <u>Representativeness of the cases</u><br/> <b>a) consecutive or obviously representative series of cases *</b><br/> b) potential for selection biases or not stated</p> <p>3) <u>Selection of Controls</u><br/> <b>a) community controls *</b><br/> b) hospital controls<br/> c) no description</p> <p>4) <u>Definition of Controls</u><br/> <b>a) no history of disease (endpoint) *</b><br/> b) no description of source</p> |
| <b>Gradus et al. (2012)</b>    | Case-control<br>****                                                                                                                                                                                                                                                                                                                                                                                                                                                                                                                                                                                                                             |
| Selection                      | <p><b>Selection</b></p> <p>1) <u>Is the case definition adequate?</u><br/> <b>a) yes, with independent validation *</b><br/> b) yes, eg record linkage or based on self reports<br/> c) no description</p> <p>2) <u>Representativeness of the cases</u><br/> <b>a) consecutive or obviously representative series of cases *</b><br/> b) potential for selection biases or not stated</p> <p>3) <u>Selection of Controls</u><br/> <b>a) community controls *</b><br/> b) hospital controls<br/> c) no description</p> <p>4) <u>Definition of Controls</u><br/> <b>a) no history of disease (endpoint) *</b><br/> b) no description of source</p> |

|                                           |                                                                                                                                                                                                                                                                                                                                                                                                                                                                                                                                                                                                                                                                                                                                                                                                                                                                                                                                                     |
|-------------------------------------------|-----------------------------------------------------------------------------------------------------------------------------------------------------------------------------------------------------------------------------------------------------------------------------------------------------------------------------------------------------------------------------------------------------------------------------------------------------------------------------------------------------------------------------------------------------------------------------------------------------------------------------------------------------------------------------------------------------------------------------------------------------------------------------------------------------------------------------------------------------------------------------------------------------------------------------------------------------|
| <p><b>Papalia et al. (2017)</b></p>       | <p>Cohort<br/>***</p>                                                                                                                                                                                                                                                                                                                                                                                                                                                                                                                                                                                                                                                                                                                                                                                                                                                                                                                               |
| <p>Selection</p>                          | <p>1) <u>Representativeness of the exposed cohort</u><br/> a) truly representative of the average _____ (describe) in the community ✱<br/> <b>b) somewhat representative of the average individual who has experienced childhood sexual abuse in the community ✱</b><br/> c) selected group of users eg nurses, volunteers<br/> d) no description of the derivation of the cohort</p> <p>2) <u>Selection of the non exposed cohort</u><br/> <b>a) drawn from the same community as the exposed cohort ✱</b><br/> b) drawn from a different source<br/> c) no description of the derivation of the non exposed cohort</p> <p>3) <u>Ascertainment of exposure</u><br/> <b>a) secure record (eg surgical records) ✱</b><br/> b) structured interview ✱<br/> c) written self report<br/> d) no description</p> <p>4) <u>Demonstration that outcome of interest was not present at start of study</u><br/> a) yes ✱<br/> <b>b) no</b></p>                |
| <p><b>van den Brink et al. (2012)</b></p> | <p>Cohort<br/>**</p>                                                                                                                                                                                                                                                                                                                                                                                                                                                                                                                                                                                                                                                                                                                                                                                                                                                                                                                                |
| <p>Selection</p>                          | <p>1) <u>Representativeness of the exposed cohort</u><br/> a) truly representative of the average _____ (describe) in the community ✱<br/> <b>b) somewhat representative of the average individual who experiences police contact due to mental health issue in the community ✱</b><br/> c) selected group of users eg nurses, volunteers<br/> d) no description of the derivation of the cohort</p> <p>2) <u>Selection of the non exposed cohort</u><br/> a) drawn from the same community as the exposed cohort ✱<br/> b) drawn from a different source<br/> <b>c) no description of the derivation of the non exposed cohort</b></p> <p>3) <u>Ascertainment of exposure</u><br/> <b>a) secure record (eg surgical records) ✱</b><br/> b) structured interview ✱<br/> c) written self report<br/> d) no description</p> <p>4) <u>Demonstration that outcome of interest was not present at start of study</u><br/> a) yes ✱<br/> <b>b) no</b></p> |

|                             |                                                                                                                                                                                                                                                                                                                                                                                                                                                                                                                                                                                                                                                                                                                                                                                                                                                                                                                       |
|-----------------------------|-----------------------------------------------------------------------------------------------------------------------------------------------------------------------------------------------------------------------------------------------------------------------------------------------------------------------------------------------------------------------------------------------------------------------------------------------------------------------------------------------------------------------------------------------------------------------------------------------------------------------------------------------------------------------------------------------------------------------------------------------------------------------------------------------------------------------------------------------------------------------------------------------------------------------|
| <b>Walter et al. (2019)</b> | Cohort<br>***                                                                                                                                                                                                                                                                                                                                                                                                                                                                                                                                                                                                                                                                                                                                                                                                                                                                                                         |
| Selection                   | <p>1) <u>Representativeness of the exposed cohort</u><br/> <b>a) truly representative of the average individual who has been a psychiatric inpatient in the community *</b><br/> b) somewhat representative of the average _____ in the community *</p> <p>c) selected group of users eg nurses, volunteers<br/> d) no description of the derivation of the cohort</p> <p>2) <u>Selection of the non exposed cohort</u><br/> <b>a) drawn from the same community as the exposed cohort *</b><br/> b) drawn from a different source<br/> c) no description of the derivation of the non exposed cohort</p> <p>3) <u>Ascertainment of exposure</u><br/> <b>a) secure record (eg surgical records) *</b><br/> b) structured interview *<br/> c) written self report<br/> d) no description</p> <p>4) <u>Demonstration that outcome of interest was not present at start of study</u><br/> a) yes *<br/> <b>b) no</b></p> |
| <b>Warren et al. (2008)</b> | Cohort<br>***                                                                                                                                                                                                                                                                                                                                                                                                                                                                                                                                                                                                                                                                                                                                                                                                                                                                                                         |
| Selection                   | <p>1) <u>Representativeness of the exposed cohort</u><br/> a) truly representative of the average _____ (describe) in the community *<br/> <b>b) somewhat representative of the average individual who makes a threat to kill in the community *</b><br/> c) selected group of users eg nurses, volunteers<br/> d) no description of the derivation of the cohort</p> <p>2) <u>Selection of the non exposed cohort</u><br/> a) drawn from the same community as the exposed cohort *<br/> b) drawn from a different source<br/> <b>c) no description of the derivation of the non exposed cohort</b></p> <p>3) <u>Ascertainment of exposure</u><br/> <b>a) secure record (eg surgical records) *</b><br/> b) structured interview *<br/> c) written self report<br/> d) no description</p> <p>4) <u>Demonstration that outcome of interest was not present at start of study</u><br/> <b>a) yes *</b><br/> b) no</p>  |
